# Supplementary material for: Validation of the 16-Gene Recurrence Score in Patients with Locoregional, High-Risk Renal Cell Carcinoma from a Phase III Trial of Adjuvant Sunitinib
Source: Oxford University Press journal article supplement (doi:10.1158/1078-0432.ccr-18-0323), 2018-05-17
Supplement: 10780432ccr180323-sup-196188_2_supp_4686003_p71c7l.pdf [file 10780432ccr180323-sup-196188_2_supp_4686003_p71c7l.pdf]

## Supplementary Fig. S1: The gene/gene groups and algorithm included in calculating the RS

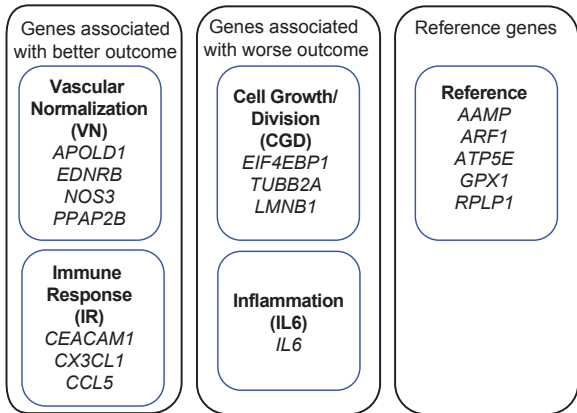

The RS is derived from the reference-normalized expression measurements, scaled from 0 to 100:

Unscaled RS =  $-0.45 \times \text{VN group score} - 0.31 \times \text{IR group score} + 0.27 \times \text{CGD group score} + 0.04 \times \text{IL6}$ .

RS =  $26.4 \times (\text{unscaled RS} + 3.7)$ .

The score is scaled: if RS is  $<0$ , then RS=0; and if RS is  $>100$ , then RS=100.

Abbreviation: RS, recurrence score.
